# Supplementary material
Source: publisher figshare collection journal article supplement (https://asha.figshare.com/articles/dataset/_/6615401)
Supplement: Supplementary file 1 [file 1]

**Supplemental Material S2.** Correlations between clinical, neuropsychological, and linguistic biomarkers and word-finding difficulty (WFD) symptoms.

| Variable                     | Patient-reported WFD  |          | Knowledgeable informant–rated WFD |          |
|------------------------------|-----------------------|----------|-----------------------------------|----------|
|                              | <i>R</i> <sup>a</sup> | <i>p</i> | <i>R</i> <sup>a</sup>             | <i>p</i> |
| Age                          | 0.16                  | .38      | 0.23                              | .19      |
| MoCA                         | −0.06                 | .74      | −0.25                             | .16      |
| UPDRS III                    | 0.20                  | .28      | 0.13                              | .47      |
| BNT                          | −0.32                 | .09      | −0.18                             | .32      |
| Letter VF                    | −0.08                 | .67      | 0.03                              | .89      |
| Words per min                | −0.36                 | .05      | −0.09                             | .63      |
| % well-formed sentences      | −0.09                 | .66      | 0.23                              | .20      |
| Nouns/100 words              | 0.04                  | .85      | −0.12                             | .52      |
| Verbs/100 words              | −0.26                 | .17      | −0.19                             | .28      |
| Pauses ≥ 1 sec/100 words     | 0.38                  | .04      | 0.14                              | .45      |
| Pauses before noun/100 nouns | 0.26                  | .16      | 0.03                              | 0.86     |
| Pauses before verb/100 verbs | 0.44                  | .02      | 0.12                              | .49      |
| Patient-reported WFD         | —                     | —        | 0.34                              | .07      |

*Note.* MoCA = Montreal Cognitive Assessment (Nasreddine et al., 2005); UPDRS III = International Parkinson and Movement Disorders Society (MDS)-Unified Parkinson’s Disease Rating Scale Part III (Litvan et al., 2012; Nasreddine et al., 2005); BNT = Boston Naming Test (Kaplan, Goodglass, & Weintraub, 1983); VF = verbal fluency.

<sup>a</sup>Spearman’s rho correlation coefficient.

## References

- Dubois, B., Burn, D., Goetz, C., Aarsland, D., Brown, R. G., Broe, G. A., . . . Emre, M. (2007). Diagnostic procedures for Parkinson’s disease dementia: Recommendations from the Movement Disorder Society task force. *Movement Disorders*, 22(16), 2314–2324. <https://doi.org/10.1002/mds.21844>
- Kaplan, E., Goodglass, H., & Weintraub, S. (1983). *The Boston Diagnostic Aphasia Examination*. Philadelphia, PA: Lea & Febiger.
- Litvan, I., Goldman, J. G., Troster, A. I., Schmand, B. A., Weintraub, D., Petersen, R. C., . . . Emre, M. (2012). Diagnostic criteria for mild cognitive impairment in Parkinson’s disease: Movement Disorder Society Task Force guidelines. *Movement Disorders*, 27(3), 349–356. <https://doi.org/10.1002/mds.24893>
- Nasreddine, Z. S., Phillips, N. A., Bedirian, V., Charbonneau, S., Whitehead, V., Collin, I., . . . Chertkow, H. (2005). The Montreal Cognitive Assessment, MoCA: A brief screening tool for mild cognitive impairment. *Journal of the American Geriatrics Society*, 53(4), 695–699. <https://doi.org/10.1111/j.1532-5415.2005.53221.x>
