# Supplementary material
Source: publisher figshare collection journal article supplement (https://asha.figshare.com/articles/dataset/_/6615401)
Supplement: Supplementary file 2 [file 1]

**Supplemental Material S1.** Baseline characteristics of Parkinson's disease (PD) with mild cognitive impairment (MCI) and normal cognition (NC).

| Variable                     | <i>M (SD) or %</i>     |                         | Mean difference ( <i>SE</i> ) | <i>p</i> |
|------------------------------|------------------------|-------------------------|-------------------------------|----------|
|                              | PD-NC ( <i>n</i> = 21) | PD-MCI ( <i>n</i> = 12) |                               |          |
| Age                          | 65.2 (6.6)             | 69.4 (6.4)              | 4.2 (2.4)                     | .10      |
| Sex                          | 62% male               | 75% male                | 0.13 (0.2)                    | .44      |
| Education                    | 16.8 (1.7)             | 16.7 (2.4)              | 0.14 (0.8)                    | .00      |
| MoCA                         | 27.9 (1.8)             | 25.9 (1.7)              | 1.94 (0.6)                    | < .01    |
| UPDRS III                    | 18.6 (7.7)             | 24.3 (13.8)             | −5.68 (4.3)                   | .31      |
| PD duration (years)          | 8.8 (5.2)              | 9.0 (4.1)               | −0.19 (1.9)                   | .88      |
| BNT                          | 58.7 (1.7)             | 54.6 (4.2)              | 4.1 (1.3)                     | < .01    |
| Letter VF                    | 49.7 (13.3)            | 43.2 (13.1)             | 6.6 (4.8)                     | .10      |
| Category VF                  | 20.3 (4.6)             | 15.5 (6.4)              | 4.8 (2.1)                     | .04      |
| Words per min modified       | 137.8 (29.3)           | 114.9 (24.1)            | 22.95 (9.44)                  | .04      |
| Words per min                | 137.5 (30.1)           | 106.5 (25.4)            | 31.07 (9.85)                  | .01      |
| % well-formed sentences      | 86.3 (14.0)            | 78.1 (17.7)             | 8.3 (6.0)                     | .18      |
| Nouns/100 words              | 21.3 (4.2)             | 19.7 (2.4)              | 1.6 (1.16)                    | .27      |
| Verbs/100 words              | 16.6 (3.2)             | 16.1 (2.4)              | 0.6 (1.0)                     | .99      |
| Pauses ≥ 1 sec/100 words     | 1.7 (1.6)              | 4.0 (2.2)               | −2.4 (0.7)                    | < .01    |
| Pauses before noun/100 nouns | 1.7 (2.5)              | 3.0 (2.7)               | −1.3 (0.9)                    | .14      |
| Pauses before verb/100 verbs | 0.7 (1.4)              | 3.9 (6.3)               | −3.2 (1.9)                    | .43      |

*Note.* MoCA = Montreal Cognitive Assessment (Nasreddine et al., 2005); UPDRS III = International Parkinson and Movement Disorders Society (MDS)-Unified Parkinson's Disease Rating Scale Part III (Litvan et al., 2012; Nasreddine et al., 2005); BNT = Boston Naming Test (Kaplan, Goodglass, & Weintraub, 1983); VF = verbal fluency.

<sup>a</sup>Spearman's rho correlation coefficient.

## References

- Dubois, B., Burn, D., Goetz, C., Aarsland, D., Brown, R. G., Broe, G. A., . . . Emre, M. (2007). Diagnostic procedures for Parkinson's disease dementia: Recommendations from the Movement Disorder Society task force. *Movement Disorders*, 22(16), 2314–2324. <https://doi.org/10.1002/mds.21844>
- Kaplan, E., Goodglass, H., & Weintraub, S. (1983). *The Boston Diagnostic Aphasia Examination*. Philadelphia, PA: Lea & Febiger.
- Litvan, I., Goldman, J. G., Troster, A. I., Schmand, B. A., Weintraub, D., Petersen, R. C., . . . Emre, M. (2012). Diagnostic criteria for mild cognitive impairment in Parkinson's disease: Movement Disorder Society Task Force guidelines. *Movement Disorders*, 27(3), 349–356. <https://doi.org/10.1002/mds.24893>
- Nasreddine, Z. S., Phillips, N. A., Bedirian, V., Charbonneau, S., Whitehead, V., Collin, I., . . . Chertkow, H. (2005). The Montreal Cognitive Assessment, MoCA: A brief screening tool for mild cognitive impairment. *Journal of*
