# Supplementary material
Source: publisher figshare collection journal article supplement (https://asha.figshare.com/articles/dataset/_/6615401)
Supplement: Supplementary file 3 [file 1]

**Supplemental Material S3.** Transcription conventions.

| <b>Linguistic occurrence</b> | <b>Definition</b>                                                | <b>Notation</b>                              |
|------------------------------|------------------------------------------------------------------|----------------------------------------------|
| Pause 0.5–1.0 second         | Any pause within an utterance of 0.5–1.0 second                  | Comma (,)                                    |
| Pause 1.0–1.5 seconds        | Any pause within an utterance of 1.0–1.5 seconds                 | Two dots (..)                                |
| Pause 1.5–2.0 seconds        | Any pause within an utterance of 1.5–2.0 seconds                 | Three dots (...)                             |
| Pause > 2.0 seconds          | Any pause between or within an utterance of at least 2.0 seconds | Duration of silence in parenthesis (x.y sec) |
